# Supplementary material for: HFE genotypes, haemochromatosis diagnosis and clinical outcomes at age 80 years: a prospective cohort study in the UK Biobank
Source: PubMed Central journal article supplement (PMC10936495; doi:10.1136/bmjopen-2023-081926), 2024-03-13
Supplement: bmjopen-2023-081926supp001.pdf [file bmjopen-2023-081926supp001.pdf]

## Supplementary Material

**eTable 1.** Incident hospital diagnosed outcomes or procedures with associated ICD-10/OPCS codes

| Disease                           | ICD-10 code                                                                                                                                                                                                                  |
|-----------------------------------|------------------------------------------------------------------------------------------------------------------------------------------------------------------------------------------------------------------------------|
| Arrhythmia                        | I49                                                                                                                                                                                                                          |
| Cardiomyopathy                    | I42                                                                                                                                                                                                                          |
| CHD                               | I20; I21; I22; I23; I24; I25                                                                                                                                                                                                 |
| Cholecystitis                     | K800; K804; K81                                                                                                                                                                                                              |
| COVID-19                          | U07.1; U07.2                                                                                                                                                                                                                 |
| Delirium                          | F05                                                                                                                                                                                                                          |
| Dementia                          | F00; F01; F02; F03; G30                                                                                                                                                                                                      |
| Alzheimer's disease               | G30                                                                                                                                                                                                                          |
| Non-Alzheimer's dementia          | F00; F01; F02; F03                                                                                                                                                                                                           |
| Depression                        | F32; F33; F34.1                                                                                                                                                                                                              |
| Fractures (any)                   | S02; S12; S22; S32; S42; S52; S62; S72; S82; S92; T02; T08; T10; T12; T14.2                                                                                                                                                  |
| Fragility fractures               | S220; S32; S325; S328; S422; S423; S424; S524; S525; S720; S721; S722; S582; S5823; T08                                                                                                                                      |
| Haemochromatosis                  | E83.1                                                                                                                                                                                                                        |
| Heart failure                     | I50; J81                                                                                                                                                                                                                     |
| Liver disease (any)               | K70; K71; K72; K73; K74; K75; K76; K77                                                                                                                                                                                       |
| Alcoholic liver disease           | K70                                                                                                                                                                                                                          |
| Fibrosis & Cirrhosis              | K74                                                                                                                                                                                                                          |
| Hepatic failure                   | K72                                                                                                                                                                                                                          |
| Liver cancer                      | C22                                                                                                                                                                                                                          |
| Lower respiratory tract infection | J20; J21; J22                                                                                                                                                                                                                |
| Osteoarthritis                    | M15.0; M15.1; M15.2; M15.9; M16.0; M16.1; M17.0; M17.1; M18.0; M18.1; M19.0                                                                                                                                                  |
| Osteoporosis                      | M80; M81; M811; M812; M813; M814; M815; M816; M818; M819                                                                                                                                                                     |
| Parkinson's disease               | G20; F02.3                                                                                                                                                                                                                   |
| Pneumonia                         | J13; J14; J15; J16; J17; J18                                                                                                                                                                                                 |
| Prostate cancer                   | C61                                                                                                                                                                                                                          |
| Rheumatoid arthritis              | M05; M06                                                                                                                                                                                                                     |
| Sepsis                            | A021; A039; A207; A241; A217; A227; A239; A267; A282; A327; A392; A393; A394; A40; A41; A427; A548; B007; B377; H440; J950; N390; O85; P36; R651; T814; T880                                                                 |
| Skin soft tissue infection        | L00; L01; L02; L03; L04; L05; L06; L07; L08                                                                                                                                                                                  |
| Type 1 or Type 2 diabetes         | E10; E11                                                                                                                                                                                                                     |
| Urinary tract infection           | N30; N34; N39                                                                                                                                                                                                                |
| Upper respiratory tract infection | J39; J06; J04                                                                                                                                                                                                                |
| Procedure                         | OPCS Code                                                                                                                                                                                                                    |
| Ankle replacement                 | O32; O320; O321; O322; O323; O324; O325                                                                                                                                                                                      |
| Hip replacement                   | W37; W370; W371; W372; W373; W374; W38; W380; W381; W382; W383; W384; W46; W460; W461; W462; W463; W47; W470; W471; W472; W473; W93; W930; W931; W932; W933; W94; W940; W941; W942; W943; O171; O172; O173; W580; W581; W582 |
| Knee replacement                  | O18*; W40*; W41*; W42*                                                                                                                                                                                                       |
| Shoulder replacement              | O06; +A11O060; O061; O062; O063; O068; O069; O07; O070; O071; O072; O073; O078; O079; O08; O080; O081; O082; O083; O084; O088; O089; O09; O091; O098; O099; O10; O101; O108; O109                                            |

ICD-10 = International Classification of Diseases 10<sup>th</sup> revision codes; OPCS-4 = OPCS Classification of Interventions and Procedures version 4. Joint replacement surgery variable includes a diagnosis of hip, knee, ankle, or shoulder replacement. Any brain outcome variable includes a diagnosis of dementia, delirium, or Parkinson's disease.

**eTable 2.** Baseline characteristics of male UK Biobank participants by p.C282Y/H63D genotypes

|                                           | No mutations  | H63D+/-      | H63D+/+     | C282Y+/H63D+ | C282Y+/-     | C282Y +/+   | Total         |
|-------------------------------------------|---------------|--------------|-------------|--------------|--------------|-------------|---------------|
| <b>Total participants</b>                 | 122,841       | 47,983       | 4,673       | 4,959        | 24,636       | 1,298       | 206,390       |
| Mean age, years (SD)                      | 56.99 (8.1)   | 57.02 (8.1)  | 56.99 (8.1) | 56.97 (8.1)  | 57.02 (8.1)  | 56.84 (8.2) | 57.00 (8.1)   |
| Haemochromatosis diagnosis, n (%)         | 29 (0.02)     | 17 (0.04)    | 8 (0.2)     | 29 (0.6)     | 27 (0.1)     | 157 (12.1)  | 267 (0.1)     |
| Self-reported fatigue, n (%)              | 12,094 (10.1) | 4,865 (10.4) | 451 (9.9)   | 523 (10.9)   | 2,476 (10.3) | 148 (11.8)  | 20,557 (10.2) |
| Self-reported fatigue (60+ years), n (%), | 4,475 (8.2)   | 1,858 (8.6)  | 173 (8.2)   | 177 (8.0)    | 924 (8.4)    | 68 (11.8)   | 7,675 (8.3)   |
| Depression diagnosis, n (%)               | 5,883 (4.8)   | 2,232 (4.7)  | 220 (4.7)   | 188 (3.8)    | 1,146 (4.7)  | 71 (5.5)    | 9,740 (4.7)   |

A total of 206,390 male participants genetically similar to the 1000 Genomes project European reference population with *HFE* genotypic data available in the UK Biobank. Numbers presented are mean (SD) for continuous variables and n (%) for categorical variables. Fatigue = tiredness in more than half the days in past 2 weeks.

**eTable 3.** Baseline characteristics of female UK Biobank participants by p.C282Y/H63D genotypes

|                                          | No mutations  | H63D+/-      | H63D+/+     | C282Y+/H63D+ | C282Y+/-     | C282Y+/+    | Total         |
|------------------------------------------|---------------|--------------|-------------|--------------|--------------|-------------|---------------|
| <b>Total participants</b>                | 145,694       | 57,021       | 5,580       | 5,760        | 29,221       | 1,604       | 244,880       |
| Mean age, years (SD)                     | 56.62 (7.9)   | 56.58 (7.9)  | 56.58 (8.1) | 56.46 (7.9)  | 56.49 (8.0)  | 56.92 (8.0) | 56.60 (7.9)   |
| Haemochromatosis diagnosis, n (%)        | 8 (0.01)      | 6 (0.01)     | <5          | 12 (0.2)     | 5 (0.02)     | 54 (3.4)    | 87 (0.04)     |
| Self-reported fatigue, n (%)             | 19,110 (13.5) | 7,449 (13.5) | 760 (14.1)  | 785 (14.1)   | 3,802 (13.4) | 220 (14.4)  | 32,126 (13.5) |
| Self-reported fatigue (60+ years), n (%) | 6,055 (10.0)  | 2,417 (10.2) | 253 (10.9)  | 229 (9.9)    | 1,157 (9.6)  | 77 (11.4)   | 10,188 (10.0) |
| Depression diagnosis, n (%)              | 10,734 (7.4)  | 4,266 (7.5)  | 387 (6.9)   | 432 (7.5)    | 2,271 (7.8)  | 123 (7.7)   | 18,213 (7.4)  |

A total of 244,880 female participants genetically similar to the 1000 Genomes project European reference population with *HFE* genotypic data available in the UK Biobank. Numbers presented are mean (SD) for continuous variables and n (%) for categorical variables. Fatigue = tiredness in more than half the days in past 2 weeks.

**eTable 4.** Incident hospital diagnoses in male UK Biobank participants by p.C282Y/H63D genotypes

| <b>Males</b>                                                   | <b>No mutations</b> | <b>H63D+/-</b> | <b>H63D+/+</b> | <b>C282Y+ / H36D+</b> | <b>C282Y+/-</b> | <b>C282Y+/+</b> |
|----------------------------------------------------------------|---------------------|----------------|----------------|-----------------------|-----------------|-----------------|
| Haemochromatosis                                               | 85 (0.1)            | 51 (0.1)       | 29 (0.6)       | 95 (1.9)              | 42 (0.2)        | 288 (25.2)      |
| All-cause mortality                                            | 13,976 (11.4)       | 5,658 (11.8)   | 540 (11.6)     | 591 (11.9)            | 2,996 (12.2)    | 194 (15.0)      |
| <b>Liver</b>                                                   |                     |                |                |                       |                 |                 |
| Liver disease (any)                                            | 3,969 (3.3)         | 1,621 (3.4)    | 160 (3.5)      | 171 (3.5)             | 803 (3.3)       | 102 (8.1)       |
| Alcoholic liver disease                                        | 608 (0.5)           | 227 (0.5)      | 25 (0.5)       | 28 (0.6)              | 150 (0.6)       | 14 (1.1)        |
| Fibrosis & Cirrhosis                                           | 618 (0.5)           | 252 (0.5)      | 24 (0.5)       | 26 (0.5)              | 142 (0.6)       | 36 (2.8)        |
| Hepatic failure                                                | 355 (0.3)           | 137 (0.3)      | 10 (0.2)       | 15 (0.3)              | 54 (0.2)        | <5              |
| <b>Cancer</b>                                                  |                     |                |                |                       |                 |                 |
| Liver cancer                                                   | 363 (0.3)           | 167 (0.4)      | 12 (0.3)       | 20 (0.4)              | 80 (0.3)        | 31 (2.4)        |
| Prostate cancer                                                | 7,723 (6.4)         | 3,025 (6.4)    | 283 (6.2)      | 319 (6.5)             | 1,613 (6.7)     | 104 (8.1)       |
| <b>Musculoskeletal</b>                                         |                     |                |                |                       |                 |                 |
| Joint replacement surgery (any)                                | 8,429 (7.1)         | 3,379 (7.3)    | 315 (7.0)      | 376 (7.8)             | 1,801 (7.5)     | 144 (11.8)      |
| Osteoarthritis                                                 | 2,873 (2.5)         | 1,155 (2.6)    | 97 (2.2)       | 120 (2.6)             | 601 (2.6)       | 61 (5.5)        |
| Fractures (any)                                                | 6,092 (5.2)         | 2,298 (5.1)    | 212 (4.8)      | 231 (4.9)             | 1,243 (5.3)     | 75 (6.2)        |
| Fragility fractures                                            | 2,666 (2.2)         | 963 (2.0)      | 79 (1.7)       | 98 (2.0)              | 551 (2.3)       | 44 (3.4)        |
| Osteoporosis                                                   | 1,522 (1.3)         | 602 (1.3)      | 42 (0.9)       | 64 (1.3)              | 319 (1.3)       | 27 (2.1)        |
| Rheumatoid arthritis                                           | 1,131 (0.9)         | 479 (1.0)      | 38 (0.8)       | 33 (0.7)              | 238 (1.0)       | 15 (1.2)        |
| <b>Brain</b>                                                   |                     |                |                |                       |                 |                 |
| Any brain outcome (dementia, delirium, or Parkinson's disease) | 4,619 (3.8)         | 1,852 (3.9)    | 177 (3.8)      | 201 (4.1)             | 993 (4.0)       | 76 (5.9)        |
| Dementia                                                       | 2,306 (1.9)         | 916 (1.9)      | 92 (2.0)       | 97 (2.0)              | 487 (2.0)       | 40 (3.1)        |
| Alzheimer's disease                                            | 1,026 (0.8)         | 380 (0.8)      | 38 (0.8)       | 50 (1.0)              | 189 (0.8)       | 13 (1.0)        |
| Non-Alzheimer's dementia                                       | 1,299 (1.1)         | 540 (1.1)      | 54 (1.2)       | 47 (1.0)              | 303 (1.2)       | 27 (2.1)        |
| Delirium                                                       | 2,621 (2.1)         | 1,028 (2.1)    | 95 (2.0)       | 112 (2.3)             | 603 (2.5)       | 45 (3.5)        |
| Parkinson's disease                                            | 1,116 (0.9)         | 454 (1.0)      | 46 (1.0)       | 43 (0.9)              | 202 (0.8)       | 21 (1.6)        |
| <b>Pancreas</b>                                                |                     |                |                |                       |                 |                 |
| T1 or T2 diabetes                                              | 9,515 (8.0)         | 3,665 (7.9)    | 368 (8.1)      | 367 (7.6)             | 1,822 (7.7)     | 119 (9.6)       |
| <b>Infection</b>                                               |                     |                |                |                       |                 |                 |
| Covid-19                                                       | 2,332 (1.9)         | 956 (2.0)      | 96 (2.1)       | 77 (1.6)              | 522 (2.1)       | 35 (2.7)        |
| Cholecystitis                                                  | 1,624 (1.3)         | 613 (1.3)      | 55 (1.2)       | 73 (1.5)              | 318 (1.3)       | 24 (1.9)        |

|                       |               |              |           |            |              |            |
|-----------------------|---------------|--------------|-----------|------------|--------------|------------|
| Pneumonia             | 8,019 (6.7)   | 3,128 (6.7)  | 273 (6.0) | 342 (7.1)  | 1,651 (6.9)  | 95 (7.6)   |
| Sepsis                | 10,081 (8.4)  | 3,955 (8.4)  | 374 (8.2) | 416 (8.6)  | 2,065 (8.6)  | 122 (9.7)  |
| LRTI                  | 4,113 (3.4)   | 1,694 (3.6)  | 148 (3.2) | 164 (3.3)  | 914 (3.7)    | 50 (3.9)   |
| URTI                  | 588 (0.5)     | 226 (0.5)    | 21 (0.5)  | 17 (0.3)   | 109 (0.4)    | <5         |
| UTI                   | 7,099 (5.9)   | 2,773 (5.9)  | 263 (5.7) | 290 (6.0)  | 1,472 (6.1)  | 96 (7.6)   |
| SSTI                  | 4,604 (3.8)   | 1,792 (3.8)  | 176 (3.8) | 216 (4.5)  | 1,053 (4.4)  | 66 (5.2)   |
| <b>Cardiovascular</b> |               |              |           |            |              |            |
| Arrhythmia            | 2,283 (1.9)   | 871 (1.8)    | 86 (1.9)  | 77 (1.6)   | 445 (1.8)    | 23 (1.8)   |
| Cardiomyopathy        | 855 (0.7)     | 330 (0.7)    | 25 (0.5)  | 34 (0.7)   | 179 (0.7)    | 6 (0.5)    |
| CHD                   | 11,796 (10.5) | 4,626 (10.5) | 412 (9.6) | 485 (10.5) | 2,422 (10.7) | 133 (11.0) |
| Heart failure         | 5,779 (4.7)   | 2,289 (4.8)  | 211 (4.6) | 229 (4.7)  | 1,256 (5.1)  | 68 (5.3)   |
| <b>Mental Health</b>  |               |              |           |            |              |            |
| Depression            | 3,929 (3.4)   | 1,615 (3.5)  | 132 (3.0) | 152 (3.2)  | 772 (3.3)    | 46 (3.8)   |

Incident disease numbers exclude prevalent disease at baseline. Numbers presented are n (%). Abbreviations: CHD, coronary heart disease; T1, type 1; T2, type 2; LRTI, lower respiratory tract infection; URTI, upper respiratory tract infection; UTI, urinary tract infection; SSTI, skin and soft tissue infection. Joint replacement surgery variable includes a diagnosis of hip, knee, ankle, or shoulder replacement. Any brain outcome variable includes a diagnosis of dementia, delirium, or Parkinson's disease.

**eTable 5.** Hazard ratios of incident disease outcomes in p.C282Y/H63D genotypes in males

| Males                                                          | No mutations | H63D +/-         |      | H63D+/+           |                        | C282Y+/H36D +       |                         | C282Y+/-         |                        | C282Y+/+               |                         |
|----------------------------------------------------------------|--------------|------------------|------|-------------------|------------------------|---------------------|-------------------------|------------------|------------------------|------------------------|-------------------------|
|                                                                |              | HR (95% CI)      | P    | HR (95% CI)       | P                      | HR (95% CI)         | P                       | HR (95% CI)      | P                      | HR (95% CI)            | P                       |
| Haemochromatosis                                               | 1            | 1.53 (1.08-2.17) | 0.02 | 8.95 (5.87-13.64) | 2.20*10 <sup>-24</sup> | 27.47 (20.49-36.84) | 1.00*10 <sup>-108</sup> | 2.40 (1.66-3.47) | 3.70*10 <sup>-06</sup> | 405.29 (317.06-518.11) | 2.97*10 <sup>-501</sup> |
| All-cause mortality                                            | 1            | 1.03 (1.00-1.06) | 0.05 | 1.01 (0.93-1.11)  | 0.75                   | 1.02 (0.94-1.11)    | 0.58                    | 1.05 (1.00-1.09) | 0.03                   | 1.29 (1.12-1.48)       | 4.70*10 <sup>-04</sup>  |
| <b>Liver</b>                                                   |              |                  |      |                   |                        |                     |                         |                  |                        |                        |                         |
| Liver disease (any)                                            | 1            | 1.05 (0.99-1.11) | 0.12 | 1.06 (0.90-1.24)  | 0.48                   | 1.06 (0.91-1.23)    | 0.46                    | 1.00 (0.93-1.78) | 0.96                   | 2.56 (2.10-3.12)       | 8.70*10 <sup>-21</sup>  |
| Alcoholic liver disease                                        | 1            | 0.95 (0.81-1.11) | 0.50 | 1.07 (0.71-1.59)  | 0.76                   | 1.07 (0.73-1.57)    | 0.72                    | 1.17 (0.98-1.40) | 0.09                   | 1.97 (1.16-3.35)       | 0.01                    |
| Fibrosis & Cirrhosis                                           | 1            | 1.04 (0.90-1.21) | 0.58 | 1.02 (0.68-1.53)  | 0.93                   | 1.00 (0.68-1.48)    | 0.99                    | 1.11 (0.92-1.33) | 0.28                   | 5.36 (3.83-7.52)       | 2.00*10 <sup>-22</sup>  |
| Hepatic failure                                                | 1            | 0.99 (0.81-1.21) | 0.92 | 0.74 (0.40-1.40)  | 0.36                   | 1.04 (0.62-1.74)    | 0.88                    | 0.75 (0.56-1.00) | 0.05                   | 0.81 (0.26-2.52)       | 0.72                    |
| <b>Cancer</b>                                                  |              |                  |      |                   |                        |                     |                         |                  |                        |                        |                         |
| Liver cancer                                                   | 1            | 1.17 (0.98-1.41) | 0.09 | 0.86 (0.48-1.53)  | 0.61                   | 1.32 (0.84-2.08)    | 0.22                    | 1.07 (0.84-1.36) | 0.61                   | 7.90 (5.46-11.43)      | 5.50*10 <sup>-28</sup>  |
| Prostate cancer                                                | 1            | 1.00 (0.96-1.05) | 0.86 | 0.96 (0.86-1.09)  | 0.56                   | 1.03 (0.93-1.16)    | 0.55                    | 1.05 (1.00-1.11) | 0.09                   | 1.33 (1.09-1.61)       | 0.004                   |
| <b>Musculoskeletal</b>                                         |              |                  |      |                   |                        |                     |                         |                  |                        |                        |                         |
| Joint replacement surgery (any)                                | 1            | 1.03 (0.99-1.07) | 0.21 | 0.98 (0.88-1.10)  | 0.74                   | 1.10 (1.00-1.22)    | 0.08                    | 1.06 (1.01-1.12) | 0.02                   | 1.78 (1.51-2.10)       | 6.40*10 <sup>-12</sup>  |
| Osteoarthritis                                                 | 1            | 1.03 (0.96-1.10) | 0.44 | 0.89 (0.72-1.09)  | 0.25                   | 1.01 (0.84-1.21)    | 0.99                    | 1.03 (0.94-1.12) | 0.55                   | 2.10 (1.63-2.71)       | 1.10*10 <sup>-08</sup>  |
| Fractures (any)                                                | 1            | 0.96 (0.92-1.01) | 0.13 | 0.92 (0.80-1.05)  | 0.23                   | 0.93 (0.82-1.06)    | 0.29                    | 1.01 (0.95-1.07) | 0.85                   | 1.18 (0.94-1.48)       | 0.16                    |
| Fragility fractures                                            | 1            | 0.92 (0.86-0.99) | 0.03 | 0.78 (0.62-0.98)  | 0.03                   | 0.90 (0.74-1.10)    | 0.31                    | 1.02 (0.93-1.12) | 0.68                   | 1.59 (1.18-2.14)       | 0.002                   |
| Osteoporosis                                                   | 1            | 1.01 (0.92-1.11) | 0.85 | 0.73 (0.53-0.99)  | 0.04                   | 1.03 (0.80-1.32)    | 0.82                    | 1.02 (0.91-1.16) | 0.70                   | 1.70 (1.16-2.48)       | 0.007                   |
| Rheumatoid arthritis                                           | 1            | 1.08 (0.97-1.21) | 0.13 | 0.89 (0.64-1.23)  | 0.48                   | 0.73 (0.51-1.03)    | 0.07                    | 1.05 (0.91-1.20) | 0.53                   | 1.30 (0.78-2.16)       | 0.31                    |
| <b>Brain</b>                                                   |              |                  |      |                   |                        |                     |                         |                  |                        |                        |                         |
| Any brain outcome (dementia, delirium, or Parkinson's disease) | 1            | 1.02 (0.97-1.08) | 0.39 | 1.02 (0.88-1.18)  | 0.83                   | 1.07 (0.93-1.24)    | 0.32                    | 1.06 (0.99-1.13) | 0.11                   | 1.65 (1.31-2.06)       | 1.70*10 <sup>-05</sup>  |
| Dementia                                                       | 1            | 1.01 (0.94-1.09) | 0.76 | 1.06 (0.86-1.31)  | 0.58                   | 1.04 (0.85-1.27)    | 0.73                    | 1.04 (0.94-1.14) | 0.48                   | 1.72 (1.26-2.35)       | 0.001                   |
| Alzheimer's disease                                            | 1            | 0.94 (0.84-1.06) | 0.32 | 0.98 (0.71-1.36)  | 0.91                   | 1.21 (0.91-1.60)    | 0.19                    | 0.90 (0.77-1.05) | 0.20                   | 1.26 (0.73-2.17)       | 0.42                    |
| Non-Alzheimer's dementia                                       | 1            | 1.06 (0.96-1.17) | 0.25 | 1.11 (0.84-1.45)  | 0.46                   | 0.89 (0.66-1.19)    | 0.43                    | 1.14 (1.01-1.30) | 0.04                   | 2.05 (1.40-3.00)       | 2.40*10 <sup>-04</sup>  |
| Delirium                                                       | 1            | 1.00 (0.93-1.08) | 0.98 | 0.96 (0.78-1.18)  | 0.69                   | 1.06 (0.87-1.28)    | 0.57                    | 1.13 (1.04-1.24) | 0.006                  | 1.69 (1.26-2.27)       | 4.80*10 <sup>-04</sup>  |
| Parkinson's disease                                            | 1            | 1.04 (0.93-1.16) | 0.47 | 1.09 (0.81-1.47)  | 0.55                   | 0.96 (0.71-1.30)    | 0.77                    | 0.90 (0.77-1.04) | 0.16                   | 1.86 (1.21-2.87)       | 0.005                   |
| <b>Pancreas</b>                                                |              |                  |      |                   |                        |                     |                         |                  |                        |                        |                         |

|                       |   |                  |      |                  |      |                  |      |                  |                        |                  |       |
|-----------------------|---|------------------|------|------------------|------|------------------|------|------------------|------------------------|------------------|-------|
| T1 or T2 diabetes     | 1 | 0.98 (0.95-1.02) | 0.44 | 1.02 (0.92-1.13) | 0.69 | 0.95 (0.86-1.06) | 0.35 | 0.95 (0.91-1.00) | 0.06                   | 1.25 (1.05-1.50) | 0.01  |
| <b>Infection</b>      |   |                  |      |                  |      |                  |      |                  |                        |                  |       |
| COVID-19              | 1 | 1.05 (0.97-1.13) | 0.21 | 1.09 (0.89-1.34) | 0.40 | 0.81 (0.65-1.02) | 0.07 | 1.11 (1.01-1.22) | 0.03                   | 1.51 (1.08-2.11) | 0.02  |
| Cholecystitis         | 1 | 0.96 (0.88-1.06) | 0.45 | 0.89 (0.68-1.16) | 0.39 | 1.11 (0.87-1.40) | 0.40 | 0.96 (0.86-1.09) | 0.56                   | 1.41 (0.94-2.11) | 0.09  |
| Pneumonia             | 1 | 1.00 (0.96-1.04) | 0.82 | 0.90 (0.80-1.02) | 0.09 | 1.04 (0.93-1.16) | 0.51 | 1.01 (0.96-1.07) | 0.68                   | 1.14 (0.93-1.40) | 0.21  |
| Sepsis                | 1 | 1.01 (0.97-1.04) | 0.78 | 0.98 (0.88-1.08) | 0.66 | 1.02 (0.92-1.12) | 0.70 | 1.01 (0.96-1.06) | 0.70                   | 1.17 (0.98-1.40) | 0.09  |
| LRTI                  | 1 | 1.05 (0.99-1.11) | 0.10 | 0.94 (0.80-1.11) | 0.46 | 0.96 (0.82-1.12) | 0.58 | 1.08 (1.00-1.16) | 0.48                   | 1.11 (0.84-1.46) | 0.48  |
| URTI                  | 1 | 0.99 (0.84-1.15) | 0.85 | 0.94 (0.61-1.45) | 0.77 | 0.71 (0.44-1.15) | 0.16 | 0.92 (0.75-1.13) | 0.41                   | 0.64 (0.24-1.71) | 0.38  |
| UTI                   | 1 | 1.00 (0.95-1.04) | 0.90 | 0.98 (0.86-1.10) | 0.69 | 1.00 (0.89-1.13) | 0.98 | 1.02 (0.96-1.08) | 0.51                   | 1.31 (1.07-1.61) | 0.008 |
| SSTI                  | 1 | 1.00 (0.94-1.05) | 0.88 | 1.01 (0.87-1.17) | 0.90 | 1.16 (1.01-1.33) | 0.03 | 1.14 (1.06-1.22) | 1.80*10 <sup>-04</sup> | 1.39 (1.09-1.77) | 0.008 |
| <b>Cardiovascular</b> |   |                  |      |                  |      |                  |      |                  |                        |                  |       |
| Arrhythmia            | 1 | 0.98 (0.90-1.06) | 0.57 | 1.00 (0.81-1.24) | 0.99 | 0.84 (0.67-1.05) | 0.13 | 0.96 (0.87-1.07) | 0.49                   | 0.97 (0.64-1.47) | 0.89  |
| Cardiomyopathy        | 1 | 0.99 (0.87-1.12) | 0.88 | 0.77 (0.52-1.15) | 0.21 | 0.99 (0.70-1.39) | 0.94 | 1.04 (0.89-1.23) | 0.60                   | 0.69 (0.31-1.53) | 0.36  |
| CHD                   | 1 | 1.01 (0.97-1.04) | 0.77 | 0.91 (0.83-1.01) | 0.08 | 1.00 (0.91-1.10) | 0.99 | 1.02 (0.97-1.06) | 0.45                   | 1.06 (0.90-1.26) | 0.49  |
| Heart failure         | 1 | 1.01 (0.96-1.06) | 0.67 | 0.96 (0.84-1.10) | 0.59 | 0.97 (0.85-1.11) | 0.65 | 1.07 (1.01-1.14) | 0.03                   | 1.14 (0.89-1.44) | 0.29  |
| <b>Mental Health</b>  |   |                  |      |                  |      |                  |      |                  |                        |                  |       |
| Depression            | 1 | 1.05 (0.99-1.12) | 0.07 | 0.88 (0.74-1.05) | 0.16 | 0.96 (0.81-1.13) | 0.60 | 0.98 (0.91-1.06) | 0.59                   | 1.15 (0.86-1.54) | 0.34  |

HR (Hazard ratio) compared to those with neither *HFE* mutation. Cox proportional hazards regression models adjusted for age, assessment centre, and genetic principal components 1–10. Abbreviations: CHD, coronary heart disease; T1, type 1; T2, type 2; LRTI, lower respiratory tract infection; URTI, upper respiratory tract infection; UTI, urinary tract infection; SSTI, skin and soft tissue infection; CI, confidence interval. Joint replacement surgery variable includes a diagnosis of hip, knee, ankle, or shoulder replacement. Any brain outcome variable includes a diagnosis of dementia, delirium, or Parkinson's disease.



**eTable 6.** Incident hospital diagnoses in male UK Biobank participants by p.C282Y/H63D genotypes, excluding a diagnosis of haemochromatosis at baseline

| <b>Males</b>                                                   | <b>No mutations</b> | <b>H63D+/-</b> | <b>H63D+/+</b> | <b>C282Y+/H36D+</b> | <b>C282Y+/-</b> | <b>C282Y+/+</b> |
|----------------------------------------------------------------|---------------------|----------------|----------------|---------------------|-----------------|-----------------|
| Haemochromatosis                                               | 85 (0.1)            | 51 (0.1)       | 29 (0.6)       | 95 (1.9)            | 42 (0.2)        | 288 (25.2)      |
| All-cause mortality                                            | 13,959 (11.4)       | 5,653 (11.8)   | 539 (11.6)     | 587 (11.9)          | 2,990 (12.2)    | 160 (14.0)      |
| <b>Liver</b>                                                   |                     |                |                |                     |                 |                 |
| Liver disease (any)                                            | 3,969 (3.3)         | 1,619 (3.4)    | 158 (3.4)      | 167 (3.4)           | 800 (3.3)       | 85 (7.5)        |
| Alcoholic liver disease                                        | 607 (0.5)           | 226 (0.5)      | 25 (0.5)       | 27 (0.6)            | 148 (0.6)       | 10 (0.9)        |
| Fibrosis & Cirrhosis                                           | 618 (0.5)           | 250 (0.5)      | 23 (0.5)       | 25 (0.5)            | 140 (0.6)       | 27 (2.4)        |
| Hepatic failure                                                | 355 (0.3)           | 137 (0.3)      | 10 (0.2)       | 15 (0.3)            | 54 (0.2)        | <5              |
| <b>Cancer</b>                                                  |                     |                |                |                     |                 |                 |
| Liver cancer                                                   | 361 (0.3)           | 166 (0.4)      | 12 (0.3)       | 19 (0.4)            | 78 (0.3)        | 17 (1.5)        |
| Prostate cancer                                                | 7,722 (6.4)         | 3,023 (6.4)    | 283 (6.2)      | 318 (6.6)           | 1,610 (6.7)     | 87 (7.7)        |
| <b>Musculoskeletal</b>                                         |                     |                |                |                     |                 |                 |
| Joint replacement surgery (any)                                | 8,427 (7.1)         | 3,377 (7.3)    | 315 (7.0)      | 375 (7.8)           | 1,801 (7.5)     | 126 (11.6)      |
| Osteoarthritis                                                 | 2,872 (2.5)         | 1,153 (2.6)    | 97 (2.2)       | 120 (2.7)           | 600 (2.6)       | 51 (5.1)        |
| Fractures (any)                                                | 6,090 (5.2)         | 2,296 (5.1)    | 212 (4.8)      | 231 (5.0)           | 1,243 (5.3)     | 66 (6.2)        |
| Fragility fractures                                            | 2,663 (2.2)         | 963 (2.0)      | 79 (1.7)       | 98 (2.0)            | 550 (2.3)       | 39 (3.5)        |
| Osteoporosis                                                   | 1,521 (1.3)         | 601 (1.3)      | 42 (0.9)       | 63 (1.3)            | 319 (1.3)       | 16 (1.4)        |
| Rheumatoid arthritis                                           | 1,130 (0.9)         | 479 (1.0)      | 38 (0.8)       | 33 (0.7)            | 238 (1.0)       | 12 (1.1)        |
| <b>Brain</b>                                                   |                     |                |                |                     |                 |                 |
| Any brain outcome (dementia, delirium, or Parkinson's disease) | 4,616 (3.8)         | 1,849 (3.9)    | 177 (3.8)      | 200 (4.1)           | 992 (4.1)       | 66 (5.8)        |
| Dementia                                                       | 2,305 (1.9)         | 915 (1.9)      | 92 (2.0)       | 97 (2.0)            | 487 (2.0)       | 33 (2.9)        |
| Alzheimer's disease                                            | 1,026 (0.8)         | 380 (0.8)      | 38 (0.8)       | 50 (1.0)            | 189 (0.8)       | 12 (1.1)        |
| Non-Alzheimer's dementia                                       | 1,298 (1.1)         | 539 (1.1)      | 54 (1.2)       | 47 (1.0)            | 303 (1.2)       | 21 (1.9)        |
| Delirium                                                       | 2,619 (2.1)         | 1,025 (2.1)    | 95 (2.0)       | 111 (2.3)           | 602 (2.5)       | 41 (3.6)        |
| Parkinson's disease                                            | 1,115 (0.9)         | 454 (1.0)      | 46 (1.0)       | 43 (0.9)            | 202 (0.8)       | 19 (1.7)        |
| <b>Pancreas</b>                                                |                     |                |                |                     |                 |                 |
| T1 or T2 diabetes                                              | 9,510 (8.0)         | 3,663 (7.9)    | 368 (8.1)      | 368 (7.6)           | 1,820 (7.7)     | 99 (9.0)        |
| <b>Infection</b>                                               |                     |                |                |                     |                 |                 |

|                       |               |              |           |            |              |            |
|-----------------------|---------------|--------------|-----------|------------|--------------|------------|
| Covid-19              | 2,331 (1.9)   | 953 (2.0)    | 96 (2.1)  | 76 (1.5)   | 522 (2.1)    | 31 (2.7)   |
| Cholecystitis         | 1,623 (1.3)   | 612 (1.3)    | 55 (1.2)  | 73 (1.5)   | 316 (1.3)    | 23 (2.0)   |
| Pneumonia             | 8,014 (6.7)   | 3,124 (6.7)  | 273 (6.0) | 340 (7.1)  | 1,649 (6.9)  | 83 (7.5)   |
| Sepsis                | 10,075 (8.4)  | 3,951 (8.4)  | 374 (8.2) | 412 (8.5)  | 2,063 (8.6)  | 103 (9.3)  |
| LRTI                  | 4,110 (3.4)   | 1,691 (3.6)  | 148 (3.2) | 164 (3.4)  | 913 (3.8)    | 45 (4.0)   |
| URTI                  | 588 (0.5)     | 226 (0.5)    | 21 (0.5)  | 17 (0.4)   | 108 (0.4)    | <5         |
| UTI                   | 7,097 (5.9)   | 2,769 (5.9)  | 263 (5.7) | 286 (5.9)  | 1,470 (6.1)  | 85 (7.6)   |
| SSTI                  | 4,599 (3.8)   | 1,790 (3.8)  | 176 (3.8) | 215 (4.5)  | 1,053 (4.4)  | 59 (5.3)   |
| <b>Cardiovascular</b> |               |              |           |            |              |            |
| Arrhythmia            | 2,282 (1.9)   | 870 (1.8)    | 85 (1.8)  | 77 (1.6)   | 444 (1.8)    | 20 (1.8)   |
| Cardiomyopathy        | 853 (0.7)     | 330 (0.7)    | 25 (0.5)  | 34 (0.7)   | 178 (0.7)    | 5 (0.4)    |
| CHD                   | 11,793 (10.5) | 4,622 (10.5) | 411 (9.6) | 481 (10.5) | 2,414 (10.7) | 115 (10.7) |
| Heart failure         | 5,775 (4.7)   | 2,285 (4.8)  | 211 (4.6) | 227 (4.6)  | 1,253 (5.1)  | 59 (5.2)   |
| <b>Mental Health</b>  |               |              |           |            |              |            |
| Depression            | 3,925 (3.4)   | 1,614 (3.5)  | 132 (3.0) | 150 (3.2)  | 771 (3.3)    | 40 (3.7)   |

Incident disease numbers exclude prevalent disease at baseline. Numbers presented are n (%). Abbreviations: CHD, coronary heart disease; T1, type 1; T2, type 2; LRTI, lower respiratory tract infection; URTI, upper respiratory tract infection; UTI, urinary tract infection; SSTI, skin and soft tissue infection. Joint replacement surgery variable includes a diagnosis of hip, knee, ankle, or shoulder replacement. Any brain outcome variable includes a diagnosis of dementia, delirium, or Parkinson's disease.

**eTable 7.** Hazard ratios of incident disease outcomes in p.C282Y/H63D genotypes in males, excluding a diagnosis of haemochromatosis at baseline

| Males                                                          | No mutations (Ref group) | H63D+/-          |      | H63D+/+           |                       | C282Y+/H36D+        |                        | C282Y+/-         |                       | C282Y+/+               |                       |
|----------------------------------------------------------------|--------------------------|------------------|------|-------------------|-----------------------|---------------------|------------------------|------------------|-----------------------|------------------------|-----------------------|
|                                                                |                          | HR (95% CI)      | P    | HR (95% CI)       | P                     | HR (95% CI)         | P                      | HR (95% CI)      | P                     | HR (95% CI)            | P                     |
| Haemochromatosis                                               | 1                        | 1.53 (1.08-2.17) | 0.02 | 8.95 (5.87-13.64) | 2.2*10 <sup>-24</sup> | 27.49 (20.50-36.86) | 1.0*10 <sup>-108</sup> | 2.40 (1.66-3.47) | 3.6*10 <sup>-06</sup> | 405.79 (317.34-518.75) | 0.00E+00              |
| All-cause mortality                                            | 1                        | 1.03 (1.00-1.07) | 0.04 | 1.01 (0.93-1.11)  | 0.74                  | 1.02 (0.94-1.11)    | 0.58                   | 1.05 (1.00-1.09) | 0.03                  | 1.22 (1.05-1.43)       | 0.01                  |
| <b>Liver</b>                                                   |                          |                  |      |                   |                       |                     |                        |                  |                       |                        |                       |
| Liver disease (any)                                            | 1                        | 1.05 (0.99-1.11) | 0.13 | 1.05 (0.89-1.23)  | 0.57                  | 1.04 (0.89-1.21)    | 0.63                   | 1.00 (0.92-1.07) | 0.90                  | 2.36 (1.90-2.93)       | 5.3*10 <sup>-15</sup> |
| Alcoholic liver disease                                        | 1                        | 0.95 (0.12-1.10) | 0.48 | 1.07 (0.72-1.60)  | 0.74                  | 1.04 (0.71-1.53)    | 0.84                   | 1.15 (0.96-1.38) | 0.12                  | 1.59 (0.85-2.97)       | 0.15                  |
| Fibrosis & Cirrhosis                                           | 1                        | 1.03 (0.89-1.20) | 0.66 | 0.98 (0.64-1.48)  | 0.91                  | 0.97 (0.65-1.44)    | 0.87                   | 1.09 (0.91-1.31) | 0.35                  | 4.52 (3.07-6.66)       | 2.1*10 <sup>-14</sup> |
| Hepatic failure                                                | 1                        | 0.99 (0.81-1.21) | 0.92 | 0.75 (0.40-1.40)  | 0.36                  | 1.05 (0.62-1.76)    | 0.86                   | 0.75 (0.56-1.00) | 0.05                  | 0.31 (0.04-2.19)       | 0.24                  |
| <b>Cancer</b>                                                  |                          |                  |      |                   |                       |                     |                        |                  |                       |                        |                       |
| Liver cancer                                                   | 1                        | 1.17 (0.98-1.41) | 0.09 | 0.87 (0.49-1.54)  | 0.63                  | 1.27 (0.80-2.02)    | 0.30                   | 1.05 (0.82-1.34) | 0.71                  | 4.97 (3.05-8.11)       | 1.2*10 <sup>-10</sup> |
| Prostate cancer                                                | 1                        | 1.00 (0.96-1.05) | 0.87 | 0.97 (0.86-1.09)  | 0.57                  | 1.04 (0.93-1.16)    | 0.51                   | 1.05 (0.99-1.11) | 0.09                  | 1.27 (1.03-1.57)       | 0.03                  |
| <b>Musculoskeletal</b>                                         |                          |                  |      |                   |                       |                     |                        |                  |                       |                        |                       |
| Joint replacement surgery (any)                                | 1                        | 1.03 (0.99-1.07) | 0.22 | 0.98 (0.88-1.10)  | 0.75                  | 1.10 (0.99-1.22)    | 0.06                   | 1.06 (1.01-1.12) | 0.02                  | 1.75 (1.47-2.09)       | 4.8*10 <sup>-10</sup> |
| Osteoarthritis                                                 | 1                        | 1.03 (0.96-1.10) | 0.46 | 0.89 (0.73-1.09)  | 0.26                  | 1.02 (0.85-1.22)    | 0.87                   | 1.03 (0.94-1.12) | 0.56                  | 1.97 (1.50-2.60)       | 1.5*10 <sup>-06</sup> |
| Fractures (any)                                                | 1                        | 0.96 (0.92-1.01) | 0.12 | 0.92 (0.80-1.06)  | 0.24                  | 0.94 (0.82-1.07)    | 0.34                   | 1.01 (0.95-1.07) | 0.82                  | 1.17 (0.91-1.49)       | 0.22                  |
| Fragility fractures                                            | 1                        | 0.92 (0.86-0.99) | 0.03 | 0.78 (0.63-0.98)  | 0.03                  | 0.91 (0.74-1.11)    | 0.34                   | 1.02 (0.93-1.12) | 0.68                  | 1.60 (1.17-2.20)       | 3.6*10 <sup>-03</sup> |
| Osteoporosis                                                   | 1                        | 1.01 (0.92-1.11) | 0.86 | 0.73 (0.54-0.99)  | 0.04                  | 1.02 (0.79-1.31)    | 0.89                   | 1.03 (0.91-1.16) | 0.68                  | 1.14 (0.69-1.86)       | 0.61                  |
| Rheumatoid arthritis                                           | 1                        | 1.09 (0.98-1.21) | 0.13 | 0.89 (0.64-1.23)  | 0.48                  | 0.73 (0.52-1.03)    | 0.07                   | 1.05 (0.91-1.20) | 0.52                  | 1.17 (0.66-2.07)       | 0.58                  |
| <b>Brain</b>                                                   |                          |                  |      |                   |                       |                     |                        |                  |                       |                        |                       |
| Any brain outcome (dementia, delirium, or Parkinson's disease) | 1                        | 1.02 (0.97-1.08) | 0.40 | 1.02 (0.88-1.18)  | 0.80                  | 1.08 (0.93-1.24)    | 0.31                   | 1.06 (0.99-1.13) | 0.10                  | 1.62 (1.27-2.07)       | 1.0*10 <sup>-04</sup> |
| Dementia                                                       | 1                        | 1.01 (0.94-1.09) | 0.76 | 1.06 (0.86-1.31)  | 0.57                  | 1.04 (0.85-1.28)    | 0.69                   | 1.04 (0.94-1.14) | 0.46                  | 1.60 (1.14-2.26)       | 0.01                  |

|                          |   |                  |      |                  |      |                  |      |                  |                       |                  |                       |
|--------------------------|---|------------------|------|------------------|------|------------------|------|------------------|-----------------------|------------------|-----------------------|
| Alzheimer's disease      | 1 | 0.94 (0.84-1.06) | 0.32 | 0.98 (0.71-1.36) | 0.92 | 1.12 (0.91-1.61) | 0.18 | 0.90 (0.77-1.06) | 0.20                  | 1.31 (0.74-2.31) | 0.35                  |
| Non-Alzheimer's dementia | 1 | 1.06 (0.96-1.17) | 0.26 | 1.11 (0.85-1.46) | 0.45 | 0.89 (0.67-1.20) | 0.45 | 1.14 (1.01-1.30) | 0.04                  | 1.81 (1.17-2.78) | 0.01                  |
| Delirium                 | 1 | 1.00 (0.93-1.07) | 0.98 | 0.96 (0.78-1.18) | 0.70 | 1.05 (0.87-1.27) | 0.59 | 1.13 (1.04-1.24) | 0.01                  | 1.75 (1.28-2.38) | 3.9*10 <sup>-04</sup> |
| Parkinson's disease      | 1 | 1.07 (0.98-1.16) | 0.13 | 1.05 (0.84-1.31) | 0.67 | 1.06 (0.85-1.33) | 0.58 | 1.01 (0.91-1.13) | 0.79                  | 1.44 (1.02-2.03) | 0.04                  |
| <b>Pancreas</b>          |   |                  |      |                  |      |                  |      |                  |                       |                  |                       |
| T1 or T2 diabetes        | 1 | 0.99 (0.95-1.02) | 0.45 | 1.02 (0.92-1.14) | 0.66 | 0.94 (0.85-1.05) | 0.28 | 0.95 (0.91-1.00) | 0.06                  | 1.17 (0.96-1.43) | 0.11                  |
| <b>Infection</b>         |   |                  |      |                  |      |                  |      |                  |                       |                  |                       |
| COVID-19                 | 1 | 1.05 (0.97-1.13) | 0.23 | 1.09 (0.89-1.34) | 0.39 | 0.81 (0.64-1.01) | 0.07 | 1.11 (1.01-1.23) | 0.03                  | 1.51 (1.06-2.15) | 0.02                  |
| Cholecystitis            | 1 | 0.96 (0.88-1.06) | 0.44 | 0.89 (0.68-1.17) | 0.40 | 1.11 (0.88-1.41) | 0.37 | 0.96 (0.85-1.08) | 0.51                  | 1.54 (1.02-2.32) | 0.04                  |
| Pneumonia                | 1 | 0.99 (0.95-1.04) | 0.80 | 0.90 (0.80-1.02) | 0.09 | 1.04 (0.93-1.16) | 0.52 | 1.01 (0.96-1.07) | 0.66                  | 1.13 (0.91-1.40) | 0.27                  |
| Sepsis                   | 1 | 1.01 (0.97-1.04) | 0.79 | 0.98 (0.88-1.09) | 0.69 | 1.01 (0.92-1.12) | 0.82 | 1.01 (0.96-1.06) | 0.68                  | 1.12 (0.92-1.36) | 0.26                  |
| LRTI                     | 1 | 1.05 (0.99-1.11) | 0.10 | 0.94 (0.80-1.11) | 0.48 | 0.96 (0.82-1.13) | 0.63 | 1.08 (1.00-1.16) | 0.04                  | 1.14 (0.85-1.52) | 0.40                  |
| URTI                     | 1 | 0.99 (0.85-1.15) | 0.85 | 0.94 (0.61-1.45) | 0.78 | 0.71 (0.44-1.16) | 0.17 | 0.91 (0.74-1.12) | 0.37                  | 0.55 (0.18-1.70) | 0.30                  |
| UTI                      | 1 | 1.00 (0.95-1.04) | 0.86 | 0.98 (0.86-1.11) | 0.71 | 1.00 (0.89-1.12) | 0.96 | 1.02 (0.96-1.08) | 0.51                  | 1.32 (1.07-1.64) | 0.01                  |
| SSTI                     | 1 | 1.00 (0.94-1.05) | 0.89 | 1.01 (0.87-1.18) | 0.87 | 1.16 (1.01-1.33) | 0.03 | 1.14 (1.07-1.22) | 1.4*10 <sup>-04</sup> | 1.40 (1.09-1.82) | 0.01                  |
| <b>Cardiovascular</b>    |   |                  |      |                  |      |                  |      |                  |                       |                  |                       |
| Arrhythmia               | 1 | 0.98 (0.90-1.06) | 0.56 | 0.99 (0.80-1.23) | 0.92 | 0.84 (0.67-1.06) | 0.15 | 0.96 (0.87-1.07) | 0.48                  | 0.96 (0.62-1.49) | 0.86                  |
| Cardiomyopathy           | 1 | 0.99 (0.87-1.13) | 0.91 | 0.78 (0.52-1.16) | 0.21 | 0.99 (0.71-1.40) | 0.98 | 1.04 (0.89-1.22) | 0.62                  | 0.65 (0.27-1.57) | 0.34                  |
| CHD                      | 1 | 1.00 (0.97-1.04) | 0.80 | 0.91 (0.83-1.01) | 0.71 | 1.00 (0.91-1.09) | 0.97 | 1.01 (0.97-1.06) | 0.52                  | 1.04 (0.87-1.25) | 0.66                  |
| Heart failure            | 1 | 1.01 (0.96-1.06) | 0.69 | 0.96 (0.84-1.11) | 0.61 | 0.97 (0.85-1.10) | 0.62 | 1.07 (1.01-1.14) | 0.03                  | 1.12 (0.87-1.45) | 0.38                  |
| <b>Mental Health</b>     |   |                  |      |                  |      |                  |      |                  |                       |                  |                       |
| Depression               | 1 | 1.05 (1.00-1.12) | 0.07 | 0.88 (0.74-1.05) | 0.17 | 0.95 (0.81-1.12) | 0.55 | 0.98 (0.91-1.06) | 0.60                  | 1.13 (0.82-1.54) | 0.46                  |

HR (Hazard ratio) compared to those with neither *HFE* mutation. Cox proportional hazards regression models adjusted for age, assessment centre, and genetic principal components 1–10. Abbreviations: CHD, coronary heart disease; T1, type 1; T2, type 2; LRTI, lower respiratory tract infection; URTI, upper respiratory tract infection; UTI, urinary tract infection SSTI, skin and soft tissue infection; CI, confidence interval. Joint replacement surgery variable includes a diagnosis of hip, knee, ankle, or shoulder replacement. Any brain outcome variable includes a diagnosis of dementia, delirium, or Parkinson's disease.

**eTable 8.** Cumulative incidence of haemochromatosis from ages 40-80 years by HFE genotypes

|                                 | Total Cohort<br>(n=451,270) |          |     | No mutations       |          |     | H63D+/-            |          |     | H63D+/+            |          |     | C282Y+/H36D+       |          |     | C282Y+/-           |          |     | C282Y+/+           |          |      |
|---------------------------------|-----------------------------|----------|-----|--------------------|----------|-----|--------------------|----------|-----|--------------------|----------|-----|--------------------|----------|-----|--------------------|----------|-----|--------------------|----------|------|
|                                 | Incident diagnosis          |          |     | Incident diagnosis |          |     | Incident diagnosis |          |     | Incident diagnosis |          |     | Incident diagnosis |          |     | Incident diagnosis |          |     | Incident diagnosis |          |      |
|                                 | %                           | (95% CI) |     | %                  | (95% CI) |     | %                  | (95% CI) |     | %                  | (95% CI) |     | %                  | (95% CI) |     | %                  | (95% CI) |     | %                  | (95% CI) |      |
| <b>Male age group (years)</b>   |                             |          |     |                    |          |     |                    |          |     |                    |          |     |                    |          |     |                    |          |     |                    |          |      |
| <b>40 - 45</b>                  | 0.1                         | 0.0      | 0.2 | 0.0                | 0.0      | 0.2 | 0.0                | 0.0      | 0.0 | 0.0                | 0.0      | 0.0 | 0.3                | 0.0      | 1.9 | 0.0                | 0.0      | 0.0 | 6.8                | 2.8      | 16.1 |
| <b>46 - 50</b>                  | 0.1                         | 0.1      | 0.2 | 0.0                | 0.0      | 0.2 | 0.0                | 0.0      | 0.1 | 0.4                | 0.1      | 1.3 | 0.7                | 0.2      | 2.0 | 0.0                | 0.0      | 0.0 | 12.5               | 7.3      | 20.8 |
| <b>51 - 55</b>                  | 0.2                         | 0.2      | 0.3 | 0.0                | 0.0      | 0.2 | 0.0                | 0.0      | 0.1 | 0.6                | 0.3      | 1.5 | 1.5                | 0.8      | 2.6 | 0.0                | 0.0      | 0.1 | 20.4               | 14.7     | 27.9 |
| <b>56 - 60</b>                  | 0.3                         | 0.3      | 0.4 | 0.1                | 0.0      | 0.2 | 0.1                | 0.0      | 0.1 | 0.8                | 0.4      | 1.6 | 2.1                | 1.3      | 3.2 | 0.1                | 0.1      | 0.2 | 28.4               | 22.7     | 35.3 |
| <b>61 - 65</b>                  | 0.4                         | 0.3      | 0.5 | 0.1                | 0.0      | 0.2 | 0.1                | 0.1      | 0.2 | 1.0                | 0.6      | 1.8 | 2.6                | 1.8      | 3.8 | 0.2                | 0.1      | 0.3 | 36.1               | 30.5     | 42.4 |
| <b>66 - 70</b>                  | 0.5                         | 0.5      | 0.6 | 0.1                | 0.1      | 0.2 | 0.2                | 0.1      | 0.2 | 1.2                | 0.7      | 2.1 | 3.6                | 2.7      | 4.8 | 0.3                | 0.2      | 0.4 | 43.0               | 37.6     | 48.7 |
| <b>71 - 75</b>                  | 0.6                         | 0.6      | 0.7 | 0.2                | 0.1      | 0.2 | 0.2                | 0.1      | 0.3 | 1.4                | 0.9      | 2.2 | 4.3                | 3.4      | 5.5 | 0.3                | 0.2      | 0.4 | 48.9               | 43.8     | 54.2 |
| <b>76 - 80</b>                  | 0.8                         | 0.7      | 0.9 | 0.2                | 0.1      | 0.3 | 0.3                | 0.2      | 0.4 | 1.9                | 1.3      | 2.9 | 5.4                | 4.3      | 6.8 | 0.4                | 0.3      | 0.6 | 56.4               | 51.4     | 61.6 |
| <b>Female age group (years)</b> |                             |          |     |                    |          |     |                    |          |     |                    |          |     |                    |          |     |                    |          |     |                    |          |      |
| <b>40 - 45</b>                  | 0.0                         | 0.0      | 0.0 | 0.0                | 0.0      | 0.0 | 0.0                | 0.0      | 0.0 | 0.0                | 0.0      | 0.0 | 0.2                | 0.0      | 1.5 | 0.0                | 0.0      | 0.0 | 0.0                | 0.0      | 0.0  |
| <b>46 - 50</b>                  | 0.0                         | 0.0      | 0.1 | 0.0                | 0.0      | 0.0 | 0.0                | 0.0      | 0.1 | 0.2                | 0.1      | 0.9 | 0.3                | 0.1      | 1.3 | 0.0                | 0.0      | 0.0 | 3.4                | 1.7      | 6.7  |
| <b>51 - 55</b>                  | 0.1                         | 0.1      | 0.1 | 0.0                | 0.0      | 0.0 | 0.0                | 0.0      | 0.1 | 0.3                | 0.1      | 1.0 | 0.5                | 0.2      | 1.3 | 0.0                | 0.0      | 0.1 | 8.2                | 5.7      | 11.7 |
| <b>56 - 60</b>                  | 0.1                         | 0.1      | 0.2 | 0.0                | 0.0      | 0.0 | 0.1                | 0.0      | 0.1 | 0.4                | 0.2      | 1.0 | 0.7                | 0.4      | 1.5 | 0.1                | 0.1      | 0.2 | 14.5               | 11.5     | 18.1 |
| <b>61 - 65</b>                  | 0.2                         | 0.2      | 0.3 | 0.0                | 0.0      | 0.0 | 0.1                | 0.0      | 0.1 | 0.5                | 0.2      | 1.1 | 1.1                | 0.6      | 1.8 | 0.1                | 0.1      | 0.2 | 21.2               | 17.9     | 24.9 |
| <b>66 - 70</b>                  | 0.3                         | 0.3      | 0.3 | 0.0                | 0.0      | 0.1 | 0.1                | 0.1      | 0.2 | 0.5                | 0.2      | 1.1 | 1.5                | 1.0      | 2.2 | 0.2                | 0.1      | 0.3 | 27.6               | 24.2     | 31.3 |
| <b>71 - 75</b>                  | 0.4                         | 0.3      | 0.4 | 0.1                | 0.0      | 0.1 | 0.1                | 0.1      | 0.2 | 0.6                | 0.3      | 1.2 | 1.9                | 1.4      | 2.7 | 0.2                | 0.2      | 0.3 | 33.5               | 30.0     | 37.2 |
| <b>76 - 80</b>                  | 0.5                         | 0.5      | 0.6 | 0.1                | 0.1      | 0.1 | 0.1                | 0.1      | 0.2 | 0.6                | 0.3      | 1.3 | 2.7                | 2.0      | 3.6 | 0.3                | 0.2      | 0.5 | 40.5               | 36.7     | 44.5 |

**eTable 9.** Incident hospital diagnoses in female UK Biobank participants by p.C282Y/H63D genotypes

| <b>Females</b>                                                 | <b>No mutations</b> | <b>H63D+/-</b> | <b>H63D+/+</b> | <b>C282Y+/H36D+</b> | <b>C282Y+/-</b> | <b>C282Y+/+</b> |
|----------------------------------------------------------------|---------------------|----------------|----------------|---------------------|-----------------|-----------------|
| Haemochromatosis                                               | 44 (0.03)           | 35 (0.1)       | 12 (0.2)       | 57 (1.0)            | 37 (0.1)        | 291 (18.8)      |
| All-cause mortality                                            | 9,849 (6.8)         | 3,810 (6.7)    | 363 (6.5)      | 393 (6.8)           | 2,020 (6.9)     | 129 (8.0)       |
| <b>Liver</b>                                                   |                     |                |                |                     |                 |                 |
| Liver disease (any)                                            | 3,822 (2.6)         | 1,512 (2.7)    | 146 (2.6)      | 179 (3.1)           | 825 (2.9)       | 69 (4.3)        |
| Alcoholic liver disease                                        | 181 (0.1)           | 78 (0.1)       | 11 (0.2)       | 6 (0.1)             | 59 (0.2)        | 7 (0.4)         |
| Fibrosis & Cirrhosis                                           | 475 (0.3)           | 163 (0.3)      | 16 (0.3)       | 21 (0.4)            | 89 (0.3)        | 14 (0.9)        |
| Hepatic failure                                                | 200 (0.1)           | 60 (0.1)       | 7 (0.1)        | <5                  | 35 (0.1)        | 5 (0.3)         |
| <b>Cancer</b>                                                  |                     |                |                |                     |                 |                 |
| Liver cancer                                                   | 232 (0.2)           | 114 (0.2)      | 10 (0.2)       | 8 (0.1)             | 49 (0.2)        | <5              |
| <b>Musculoskeletal</b>                                         |                     |                |                |                     |                 |                 |
| Joint replacement surgery (any)                                | 12,356 (8.7)        | 4,772 (8.6)    | 454 (8.4)      | 501 (8.9)           | 2,415 (8.5)     | 158 (10.3)      |
| Osteoarthritis                                                 | 4,344 (3.3)         | 1,681 (3.3)    | 177 (3.6)      | 190 (3.7)           | 893 (3.4)       | 70 (5.1)        |
| Fractures (any)                                                | 10,666 (7.6)        | 4,204 (7.7)    | 376 (7.0)      | 430 (7.7)           | 2,189 (7.8)     | 124 (8.0)       |
| Fragility fractures                                            | 6,308 (4.4)         | 2,517 (4.5)    | 214 (3.9)      | 275 (4.8)           | 1,265 (4.4)     | 63 (4.0)        |
| Osteoporosis                                                   | 6,990 (5.0)         | 2,580 (4.7)    | 254 (4.7)      | 245 (4.4)           | 1,390 (4.9)     | 103 (6.7)       |
| Rheumatoid arthritis                                           | 2,189 (1.5)         | 819 (1.5)      | 79 (1.4)       | 87 (1.5)            | 391 (1.4)       | 26 (1.6)        |
| <b>Brain</b>                                                   |                     |                |                |                     |                 |                 |
| Any brain outcome (dementia, delirium, or Parkinson's disease) | 3,876 (2.7)         | 1,547 (2.7)    | 142 (2.6)      | 155 (2.7)           | 777 (2.7)       | 61 (3.8)        |
| Dementia                                                       | 2,159 (1.5)         | 837 (1.5)      | 68 (1.2)       | 84 (1.5)            | 440 (1.5)       | 31 (1.9)        |
| Alzheimer's disease                                            | 1,072 (0.7)         | 450 (0.8)      | 37 (0.7)       | 51 (0.9)            | 220 (0.8)       | 14 (0.9)        |
| Non-Alzheimer's dementia                                       | 1,099 (0.8)         | 395 (0.7)      | 31 (0.6)       | 34 (0.6)            | 227 (0.8)       | 17 (1.1)        |
| Delirium                                                       | 1,983 (1.4)         | 823 (1.4)      | 81 (1.5)       | 82 (1.4)            | 406 (1.4)       | 36 (2.2)        |
| Parkinson's disease                                            | 691 (0.5)           | 249 (0.4)      | 26 (0.5)       | 30 (0.5)            | 134 (0.5)       | 8 (0.5)         |
| <b>Pancreas</b>                                                |                     |                |                |                     |                 |                 |
| T1 or T2 diabetes                                              | 6,532 (4.6)         | 2,583 (4.6)    | 245 (4.5)      | 278 (4.9)           | 1,327 (4.6)     | 87 (5.5)        |
| <b>Infection</b>                                               |                     |                |                |                     |                 |                 |
| Covid-19                                                       | 1,809 (1.2)         | 720 (1.3)      | 72 (1.3)       | 72 (1.3)            | 383 (1.3)       | 21 (1.3)        |
| Cholecystitis                                                  | 1,749 (1.2)         | 675 (1.2)      | 62 (1.1)       | 69 (1.2)            | 351 (1.2)       | 30 (1.9)        |
| Pneumonia                                                      | 6,130 (4.3)         | 2,408 (4.3)    | 242 (4.4)      | 255 (4.5)           | 1,276 (4.5)     | 75 (4.8)        |

|                       |              |             |           |           |             |           |
|-----------------------|--------------|-------------|-----------|-----------|-------------|-----------|
| Sepsis                | 10,026 (7.0) | 3,840 (6.9) | 379 (7.0) | 414 (7.4) | 2,103 (7.4) | 133 (8.5) |
| LRTI                  | 3,875 (2.7)  | 1,439 (2.5) | 139 (2.5) | 144 (2.5) | 821 (2.8)   | 53 (3.3)  |
| URTI                  | 636 (0.4)    | 279 (0.5)   | 21 (0.4)  | 21 (0.4)  | 142 (0.5)   | <5        |
| UTI                   | 9,140 (6.5)  | 3,493 (6.4) | 351 (6.6) | 366 (6.7) | 1,905 (6.8) | 126 (8.2) |
| SSTI                  | 3,900 (2.7)  | 1,534 (2.7) | 158 (2.9) | 153 (2.7) | 799 (2.8)   | 53 (3.3)  |
| <b>Cardiovascular</b> |              |             |           |           |             |           |
| Arrhythmia            | 1,655 (1.1)  | 656 (1.2)   | 48 (0.9)  | 67 (1.2)  | 323 (1.1)   | 20 (1.3)  |
| Cardiomyopathy        | 608 (0.4)    | 230 (0.4)   | 19 (0.3)  | 26 (0.5)  | 130 (0.5)   | <5        |
| CHD                   | 7,402 (5.3)  | 2,877 (5.2) | 294 (5.4) | 293 (5.3) | 1,502 (5.3) | 82 (5.3)  |
| Heart failure         | 3,551 (2.4)  | 1,431 (2.5) | 127 (2.3) | 155 (2.7) | 753 (2.6)   | 56 (3.5)  |
| <b>Mental Health</b>  |              |             |           |           |             |           |
| Depression            | 6,415 (4.8)  | 2,430 (4.6) | 269 (5.2) | 279 (5.2) | 1,317 (4.9) | 64 (4.3)  |

Incident disease numbers exclude prevalent disease at baseline. Numbers presented are n (%). Abbreviations: CHD, coronary heart disease; T1, type 1; T2, type 2; LRTI, lower respiratory tract infection; URTI, upper respiratory tract infection; UTI, urinary tract infection; SSTI, skin and soft tissue infection. Joint replacement surgery variable includes a diagnosis of hip, knee, ankle, or shoulder replacement. Any brain outcome variable includes a diagnosis of dementia, delirium, or Parkinson's disease.

**eTable 10.** Hazard ratios of incident disease outcomes in p.C282Y/H63D genotypes in females

| Females                                                        | No mutations | H63D+/-          |                        | H63D+/+           |                        | C282Y+/H36D+        |                        | C282Y+/-         |                        | C282Y+/+               |                         |
|----------------------------------------------------------------|--------------|------------------|------------------------|-------------------|------------------------|---------------------|------------------------|------------------|------------------------|------------------------|-------------------------|
|                                                                |              | HR (95% CI)      | P                      | HR (95% CI)       | P                      | HR (95% CI)         | P                      | HR (95% CI)      | P                      | HR (95% CI)            | P                       |
| Haemochromatosis                                               | 1            | 2.04 (1.31-3.17) | 1.70*10 <sup>-03</sup> | 7.10 (3.75-13.45) | 1.80*10 <sup>-09</sup> | 32.78 (22.10-48.63) | 2.20*10 <sup>-67</sup> | 4.15 (2.68-6.44) | 1.80*10 <sup>-10</sup> | 674.10 (489.11-929.05) | 2.47*10 <sup>-346</sup> |
| All-cause mortality                                            | 1            | 0.99 (0.96-1.03) | 0.68                   | 0.95 (0.85-1.05)  | 0.30                   | 1.01 (0.91-1.11)    | 0.90                   | 1.01 (0.96-1.06) | 0.62                   | 1.10 (0.92-1.31)       | 0.28                    |
| <b>Liver</b>                                                   |              |                  |                        |                   |                        |                     |                        |                  |                        |                        |                         |
| Liver disease (any)                                            | 1            | 1.01 (0.95-1.07) | 0.72                   | 1.00 (0.84-1.17)  | 0.96                   | 1.19 (1.02-1.38)    | 0.03                   | 1.08 (1.00-1.16) | 0.06                   | 1.62 (1.27-2.05)       | 7.80*10 <sup>-05</sup>  |
| Alcoholic liver disease                                        | 1            | 1.09 (0.84-1.43) | 0.51                   | 1.56 (0.85-2.87)  | 0.15                   | 0.78 (0.35-1.77)    | 0.56                   | 1.53 (1.14-2.05) | 0.005                  | 3.07 (1.44-6.54)       | 0.004                   |
| Fibrosis & Cirrhosis                                           | 1            | 0.87 (0.73-1.04) | 0.13                   | 0.87 (0.53-1.43)  | 0.58                   | 1.10 (0.71-1.71)    | 0.67                   | 0.92 (0.74-1.16) | 0.49                   | 2.56 (1.50-4.36)       | 0.001                   |
| Hepatic failure                                                | 1            | 0.77 (0.58-1.02) | 0.07                   | 0.92 (0.43-1.94)  | 0.82                   | 0.49 (0.18-1.33)    | 0.16                   | 0.85 (0.59-1.21) | 0.37                   | 2.09 (0.86-5.08)       | 0.10                    |
| <b>Cancer</b>                                                  |              |                  |                        |                   |                        |                     |                        |                  |                        |                        |                         |
| Liver cancer                                                   | 1            | 1.26 (1.01-1.58) | 0.04                   | 1.13 (0.60-2.13)  | 0.71                   | 0.89 (0.44-1.81)    | 0.75                   | 1.06 (0.78-1.45) | 0.69                   | 1.17 (0.37-3.66)       | 0.79                    |
| <b>Musculoskeletal</b>                                         |              |                  |                        |                   |                        |                     |                        |                  |                        |                        |                         |
| Joint replacement surgery (any)                                | 1            | 0.99 (0.96-1.02) | 0.55                   | 0.97 (0.88-1.06)  | 0.47                   | 1.04 (0.95-1.14)    | 0.34                   | 0.99 (0.94-1.03) | 0.51                   | 1.18 (1.01-1.38)       | 0.04                    |
| Osteoarthritis                                                 | 1            | 0.99 (0.94-1.05) | 0.71                   | 1.06 (0.91-1.23)  | 0.46                   | 1.10 (0.95-1.27)    | 0.21                   | 1.02 (0.95-1.10) | 0.60                   | 1.44 (1.14-1.82)       | 0.002                   |
| Fractures (any)                                                | 1            | 1.01 (0.97-1.04) | 0.65                   | 0.91 (0.82-1.01)  | 0.07                   | 1.01 (0.92-1.12)    | 0.79                   | 1.02 (0.97-1.07) | 0.42                   | 1.00 (0.84-1.20)       | 0.96                    |
| Fragility fractures                                            | 1            | 1.02 (0.98-1.07) | 0.38                   | 0.87 (0.76-1.00)  | 0.05                   | 1.10 (0.97-1.24)    | 0.13                   | 0.99 (0.93-1.05) | 0.74                   | 0.85 (0.66-1.09)       | 0.19                    |
| Osteoporosis                                                   | 1            | 0.94 (0.90-0.99) | 0.01                   | 0.94 (0.83-1.07)  | 0.34                   | 0.89 (0.79-1.01)    | 0.08                   | 0.99 (0.94-1.05) | 0.75                   | 1.28 (1.06-1.56)       | 0.01                    |
| Rheumatoid arthritis                                           | 1            | 0.96 (0.88-1.04) | 0.28                   | 0.94 (0.75-1.17)  | 0.58                   | 1.01 (0.82-1.26)    | 0.90                   | 0.89 (0.80-0.99) | 0.03                   | 1.04 (0.71-1.53)       | 0.84                    |
| <b>Brain</b>                                                   |              |                  |                        |                   |                        |                     |                        |                  |                        |                        |                         |
| Any brain outcome (dementia, delirium, or Parkinson's disease) | 1            | 1.02 (0.97-1.09) | 0.43                   | 0.93 (0.79-1.11)  | 0.43                   | 1.03 (0.88-1.21)    | 0.72                   | 1.00 (0.92-1.08) | 0.90                   | 1.30 (1.01-1.68)       | 0.04                    |
| Dementia                                                       | 1            | 1.00 (0.92-1.08) | 0.94                   | 0.80 (0.63-1.02)  | 0.07                   | 1.00 (0.81-1.25)    | 0.98                   | 1.01 (0.91-1.12) | 0.86                   | 1.16 (0.81-1.66)       | 0.41                    |
| Alzheimer's disease                                            | 1            | 1.08 (0.97-1.20) | 0.18                   | 0.87 (0.63-1.20)  | 0.40                   | 1.22 (0.92-1.61)    | 0.17                   | 1.02 (0.88-1.17) | 0.84                   | 1.04 (0.62-1.77)       | 0.88                    |



|                          |   |                  |      |                  |      |                  |      |                  |      |                  |      |
|--------------------------|---|------------------|------|------------------|------|------------------|------|------------------|------|------------------|------|
| Non-Alzheimer's dementia | 1 | 0.93 (0.83-1.04) | 0.20 | 0.72 (0.50-1.03) | 0.07 | 0.81 (0.57-1.13) | 0.21 | 1.03 (0.89-1.18) | 0.73 | 1.27 (0.76-2.05) | 0.33 |
| Delirium                 | 1 | 1.06 (0.98-1.15) | 0.13 | 1.05 (0.84-1.31) | 0.67 | 1.06 (0.85-1.32) | 0.60 | 1.01 (0.91-1.13) | 0.80 | 1.50 (1.08-2.08) | 0.02 |
| Parkinson's disease      | 1 | 0.93 (0.80-1.07) | 0.29 | 0.97 (0.66-1.44) | 0.89 | 1.14 (0.79-1.65) | 0.48 | 0.98 (0.81-1.18) | 0.84 | 1.00 (0.50-2.00) | 0.99 |
| <b>Pancreas</b>          |   |                  |      |                  |      |                  |      |                  |      |                  |      |
| T1 or T2 diabetes        | 1 | 1.01 (0.97-1.06) | 0.55 | 0.98 (0.86-1.11) | 0.77 | 1.09 (0.97-1.23) | 0.17 | 1.01 (0.96-1.08) | 0.60 | 1.18 (0.95-1.46) | 0.13 |
| <b>Infection</b>         |   |                  |      |                  |      |                  |      |                  |      |                  |      |
| COVID-19                 | 1 | 1.02 (0.94-1.11) | 0.66 | 1.03 (0.81-1.30) | 0.83 | 1.02 (0.80-1.29) | 0.90 | 1.06 (0.94-1.18) | 0.34 | 1.00 (0.65-1.54) | 0.99 |
| Cholecystitis            | 1 | 0.98 (0.90-1.08) | 0.73 | 0.92 (0.71-1.18) | 0.52 | 0.99 (0.78-1.26) | 0.92 | 0.99 (0.88-1.11) | 0.86 | 1.49 (1.04-2.13) | 0.03 |
| Pneumonia                | 1 | 1.01 (0.96-1.05) | 0.83 | 1.02 (0.90-1.16) | 0.72 | 1.06 (0.93-1.20) | 0.40 | 1.03 (0.97-1.10) | 0.29 | 1.05 (0.83-1.32) | 0.69 |
| Sepsis                   | 1 | 0.98 (0.94-1.01) | 0.23 | 0.97 (0.88-1.08) | 0.61 | 1.05 (0.95-1.15) | 0.36 | 1.04 (0.99-1.09) | 0.12 | 1.13 (0.96-1.35) | 0.15 |
| LRTI                     | 1 | 0.95 (0.89-1.01) | 0.08 | 0.92 (0.78-1.09) | 0.34 | 0.93 (0.79-1.10) | 0.39 | 1.04 (0.97-1.12) | 0.30 | 1.16 (0.89-1.52) | 0.28 |
| URTI                     | 1 | 1.12 (0.98-1.30) | 0.10 | 0.86 (0.56-1.33) | 0.51 | 0.84 (0.54-1.30) | 0.43 | 1.12 (0.93-1.34) | 0.24 | 0.28 (0.07-1.12) | 0.07 |
| UTI                      | 1 | 0.97 (0.94-1.01) | 0.18 | 0.99 (0.89-1.10) | 0.82 | 1.01 (0.91-1.13) | 0.80 | 1.03 (0.98-1.08) | 0.23 | 1.19 (0.99-1.41) | 0.06 |
| SSTI                     | 1 | 1.01 (0.95-1.07) | 0.79 | 1.05 (0.90-1.23) | 0.54 | 1.00 (0.85-1.18) | 0.97 | 1.03 (0.95-1.11) | 0.52 | 1.20 (0.92-1.58) | 0.18 |
| <b>Cardiovascular</b>    |   |                  |      |                  |      |                  |      |                  |      |                  |      |
| Arrhythmia               | 1 | 1.02 (0.93-1.11) | 0.69 | 0.76 (0.57-1.01) | 0.06 | 1.04 (0.81-1.33) | 0.75 | 0.98 (0.87-1.11) | 0.78 | 1.07 (0.69-1.67) | 0.75 |
| Cardiomyopathy           | 1 | 0.97 (0.83-1.13) | 0.71 | 0.82 (0.52-1.30) | 0.41 | 1.11 (0.75-1.64) | 0.61 | 1.08 (0.90-1.31) | 0.41 | 0.44 (0.14-1.37) | 0.16 |
| CHD                      | 1 | 1.00 (0.95-1.04) | 0.82 | 1.03 (0.92-1.16) | 0.61 | 1.01 (0.90-1.14) | 0.86 | 1.01 (0.96-1.07) | 0.71 | 0.94 (0.76-1.17) | 0.60 |
| Heart failure            | 1 | 1.04 (0.97-1.10) | 0.27 | 0.92 (0.77-1.10) | 0.35 | 1.12 (0.96-1.32) | 0.15 | 1.06 (0.98-1.15) | 0.16 | 1.34 (1.03-1.75) | 0.03 |
| <b>Mental Health</b>     |   |                  |      |                  |      |                  |      |                  |      |                  |      |
| Depression               | 1 | 0.97 (0.93-1.02) | 0.20 | 1.10 (0.97-1.24) | 0.14 | 1.11 (0.99-1.25) | 0.09 | 1.03 (0.97-1.09) | 0.38 | 0.90 (0.70-1.15) | 0.39 |

HR (Hazard ratio) compared to those with neither *HFE* mutation. Cox proportional hazards regression models adjusted for age, assessment centre, and genetic principal components 1–10. Abbreviations: CHD, coronary heart disease; T1, type 1; T2, type 2; LRTI, lower respiratory tract infection; URTI, upper respiratory tract infection; UTI, urinary tract infection SSTI, skin and soft tissue infection; CI, confidence interval. Joint replacement surgery variable includes a diagnosis of hip, knee, ankle, or shoulder replacement. Any brain outcome variable includes a diagnosis of dementia, delirium, or Parkinson's disease.

**eTable 11.** Incident hospital diagnoses in female UK Biobank participants by p.C282Y/H63D genotypes, excluding a diagnosis of haemochromatosis at baseline

| <b>Females</b>                                                 | <b>No mutations</b> | <b>H63D+/-</b> | <b>H63D+/+</b> | <b>C282Y+/H36D+</b> | <b>C282Y+/-</b> | <b>C282Y+/+</b> |
|----------------------------------------------------------------|---------------------|----------------|----------------|---------------------|-----------------|-----------------|
| Haemochromatosis                                               | 44 (0.03)           | 35 (0.1)       | 12 (0.2)       | 57 (1.0)            | 37 (0.1)        | 291 (18.8)      |
| All-cause mortality                                            | 9,847 (6.8)         | 3,810 (6.7)    | 363 (6.5)      | 390 (6.8)           | 2,020 (6.9)     | 127 (8.2)       |
| <b>Liver</b>                                                   |                     |                |                |                     |                 |                 |
| Liver disease (any)                                            | 3,821 (2.6)         | 1,511 (2.7)    | 146 (2.6)      | 177 (3.1)           | 825 (2.9)       | 65 (4.2)        |
| Alcoholic liver disease                                        | 180 (0.1)           | 78 (0.1)       | 11 (0.2)       | 6 (0.1)             | 59 (0.2)        | 6 (0.4)         |
| Fibrosis & Cirrhosis                                           | 473 (0.3)           | 162 (0.3)      | 16 (0.3)       | 21 (0.4)            | 89 (0.3)        | 14 (0.9)        |
| Hepatic failure                                                | 199 (0.1)           | 60 (0.1)       | 7 (0.1)        | <5                  | 35 (0.1)        | <5              |
| <b>Cancer</b>                                                  |                     |                |                |                     |                 |                 |
| Liver cancer                                                   | 232 (0.2)           | 114 (0.2)      | 10 (0.2)       | 8 (0.1)             | 49 (0.2)        | <5              |
| <b>Musculoskeletal</b>                                         |                     |                |                |                     |                 |                 |
| Joint replacement surgery (any)                                | 12,355 (8.7)        | 4,771 (8.6)    | 454 (8.4)      | 500 (8.9)           | 2,415 (8.5)     | 150 (10.1)      |
| Osteoarthritis                                                 | 4,343 (3.3)         | 1,681 (3.3)    | 177 (3.6)      | 189 (3.7)           | 893 (3.4)       | 68 (5.1)        |
| Fractures (any)                                                | 10,665 (7.6)        | 4,204 (7.7)    | 375 (7.0)      | 430 (7.7)           | 2,188 (7.8)     | 119 (8.0)       |
| Fragility fractures                                            | 6,308 (4.4)         | 2,517 (4.5)    | 214 (3.9)      | 275 (4.8)           | 1,264 (4.4)     | 61 (4.0)        |
| Osteoporosis                                                   | 6,990 (5.0)         | 2,580 (4.7)    | 254 (4.7)      | 244 (4.4)           | 1,389 (4.9)     | 97 (6.5)        |
| Rheumatoid arthritis                                           | 2,188 (1.5)         | 818 (1.5)      | 79 (1.4)       | 86 (1.5)            | 390 (1.4)       | 23 (1.5)        |
| <b>Brain</b>                                                   |                     |                |                |                     |                 |                 |
| Any brain outcome (dementia, delirium, or Parkinson's disease) | 3,875 (2.7)         | 1,547 (2.7)    | 142 (2.6)      | 154 (2.7)           | 777 (2.7)       | 55 (3.6)        |
| Dementia                                                       | 2,159 (1.5)         | 837 (1.5)      | 68 (1.2)       | 83 (1.4)            | 440 (1.5)       | 28 (1.8)        |
| Alzheimer's disease                                            | 1,072 (0.7)         | 450 (0.8)      | 37 (0.7)       | 50 (0.9)            | 220 (0.8)       | 13 (0.8)        |
| Non-Alzheimer's dementia                                       | 1,099 (0.8)         | 395 (0.7)      | 31 (0.6)       | 34 (0.6)            | 227 (0.8)       | 15 (1.0)        |
| Delirium                                                       | 1,982 (1.4)         | 823 (1.4)      | 81 (1.5)       | 82 (1.4)            | 406 (1.4)       | 33 (2.1)        |
| Parkinson's disease                                            | 691 (0.5)           | 249 (0.4)      | 26 (0.5)       | 30 (0.5)            | 134 (0.5)       | 8 (0.5)         |
| <b>Pancreas</b>                                                |                     |                |                |                     |                 |                 |
| T1 or T2 diabetes                                              | 6,531 (4.6)         | 2,583 (4.6)    | 244 (4.5)      | 276 (4.9)           | 1,327 (4.6)     | 80 (5.3)        |

|                       |              |             |           |           |             |           |
|-----------------------|--------------|-------------|-----------|-----------|-------------|-----------|
| <b>Infection</b>      |              |             |           |           |             |           |
| Covid-19              | 1,809 (1.2)  | 719 (1.3)   | 72 (1.3)  | 72 (1.3)  | 383 (1.3)   | 20 (1.3)  |
| Cholecystitis         | 1,749 (1.2)  | 675 (1.2)   | 62 (1.1)  | 68 (1.2)  | 351 (1.2)   | 29 (1.9)  |
| Pneumonia             | 6,127 (4.3)  | 2,406 (4.3) | 242 (4.4) | 254 (4.5) | 1,275 (4.5) | 70 (4.6)  |
| Sepsis                | 10,024 (7.0) | 3,837 (6.9) | 379 (7.0) | 414 (7.4) | 2,103 (7.4) | 128 (8.5) |
| LRTI                  | 3,875 (2.7)  | 1,437 (2.5) | 139 (2.5) | 143 (2.5) | 821 (2.8)   | 50 (3.3)  |
| URTI                  | 636 (0.4)    | 277 (0.5)   | 21 (0.4)  | 21 (0.4)  | 142 (0.5)   | <5        |
| UTI                   | 9,137 (6.5)  | 3,490 (6.4) | 351 (6.6) | 366 (6.7) | 1,905 (6.8) | 119 (8.0) |
| SSTI                  | 3,900 (2.7)  | 1,533 (2.7) | 158 (2.9) | 152 (2.7) | 799 (2.8)   | 51 (3.3)  |
| <b>Cardiovascular</b> |              |             |           |           |             |           |
| Arrhythmia            | 1,654 (1.1)  | 656 (1.2)   | 48 (0.9)  | 67 (1.2)  | 323 (1.1)   | 20 (1.3)  |
| Cardiomyopathy        | 608 (0.4)    | 230 (0.4)   | 19 (0.3)  | 25 (0.4)  | 130 (0.5)   | <5        |
| CHD                   | 7,401 (5.3)  | 2,875 (5.2) | 294 (5.4) | 291 (5.2) | 1,502 (5.3) | 77 (5.1)  |
| Heart failure         | 3,550 (2.4)  | 1,430 (2.5) | 127 (2.3) | 154 (2.7) | 753 (2.6)   | 54 (3.5)  |
| <b>Mental Health</b>  |              |             |           |           |             |           |
| Depression            | 6,414 (4.8)  | 2,430 (4.6) | 269 (5.2) | 278 (5.2) | 1,317 (4.9) | 57 (4.0)  |

Incident disease numbers exclude prevalent disease at baseline. Numbers presented are n (%). Abbreviations: CHD, coronary heart disease; T1, type 1; T2, type 2; LRTI, lower respiratory tract infection; URTI, upper respiratory tract infection; UTI, urinary tract infection; SSTI, skin and soft tissue infection. Joint replacement surgery variable includes a diagnosis of hip, knee, ankle, or shoulder replacement. Any brain outcome variable includes a diagnosis of dementia, delirium, or Parkinson's disease.

**Table 12.** Hazard ratios of incident disease outcomes in p.C282Y/H63D genotypes in females, excluding a diagnosis of haemochromatosis at baseline

| Females                                                        | No mutations (Ref group) | H63D+/-          |          | H63D +/+          |          | C282Y+/ H36D +      |          | C282Y+/-          |          | C282Y+/+               |          |
|----------------------------------------------------------------|--------------------------|------------------|----------|-------------------|----------|---------------------|----------|-------------------|----------|------------------------|----------|
|                                                                |                          | HR (95% CI)      | P        | HR (95% CI)       | P        | HR (95% CI)         | P        | HR (95% CI)       | P        | HR (95% CI)            | P        |
| Haemochromatosis                                               | 1                        | 2.04 (1.31-3.17) | 1.70E-03 | 7.10 (3.75-13.45) | 1.80E-09 | 32.79 (22.10-48.64) | 2.10E-67 | 4.15 (2.68-6.44)  | 1.80E-10 | 675.18 (489.89-930.55) | 0.00E+00 |
| All-cause mortality                                            | 1                        | 0.99 (0.96-1.03) | 0.69     | 0.95 (0.85-1.05)  | 0.31     | 1.00 (0.90-1.11)    | 0.98     | 1.01 (0.97-1.06)  | 0.61     | 1.13 (0.95-1.35)       | 0.16     |
| <b>Liver</b>                                                   |                          |                  |          |                   |          |                     |          |                   |          |                        |          |
| Liver disease (any)                                            | 1                        | 1.01 (0.95-1.07) | 0.73     | 1.00 (0.84-1.18)  | 0.97     | 1.18 (1.01-1.37)    | 0.03     | 1.08 (1.00-1.16)  | 0.06     | 1.58 (1.23-2.02)       | 2.80E-04 |
| Alcoholic liver disease                                        | 1                        | 1.10 (0.84-1.43) | 0.48     | 1.57 (0.85-2.88)  | 0.15     | 0.79 (0.35-1.78)    | 0.57     | 1.54 (1.14-2.06)  | 0.43     | 2.75 (1.21-6.20)       | 0.02     |
| Fibrosis & Cirrhosis                                           | 1                        | 0.87 (0.73-1.04) | 0.13     | 0.87 (0.53-1.44)  | 0.60     | 1.11 (0.72-1.72)    | 0.65     | 0.93 (0.74-1.16)  | 0.51     | 2.67 (1.57-4.55)       | 3.00E-04 |
| Hepatic failure                                                | 1                        | 0.77 (0.58-1.03) | 0.08     | 0.92 (0.43-1.95)  | 0.83     | 0.50 (0.18-1.34)    | 0.17     | 0.85 (0.59-1.22)  | 0.38     | 1.76 (0.65-4.74)       | 0.26     |
| <b>Cancer</b>                                                  |                          |                  |          |                   |          |                     |          |                   |          |                        |          |
| Liver cancer                                                   | 1                        | 1.26 (1.10-1.58) | 0.04     | 1.13 (0.60-2.13)  | 0.71     | 0.89 (0.44-1.81)    | 0.75     | 1.06 (0.78-1.45)  | 0.69     | 1.22 (0.39-3.81)       | 0.73     |
| <b>Musculoskeletal</b>                                         |                          |                  |          |                   |          |                     |          |                   |          |                        |          |
| Joint replacement surgery (any)                                | 1                        | 0.99 (0.96-1.02) | 0.54     | 0.97 (0.88-1.06)  | 0.47     | 1.04 (0.95-1.14)    | 0.35     | 0.99 (0.94-1.03)  | 0.51     | 1.16 (0.99-1.37)       | 0.07     |
| Osteoarthritis                                                 | 1                        | 0.99 (0.94-1.05) | 0.72     | 1.06 (0.91-1.23)  | 0.46     | 1.09 (0.95-1.27)    | 0.22     | 1.02 (0.95-1.10)  | 0.59     | 1.46 (1.15-1.85)       | 2.10E-03 |
| Fractures (any)                                                | 1                        | 1.01 (0.97-1.05) | 0.65     | 0.91 (0.82-1.01)  | 0.07     | 1.02 (0.92-1.12)    | 0.76     | 1.02 (0.97-1.07)  | 0.42     | 1.01 (0.84-1.20)       | 0.95     |
| Fragility fractures                                            | 1                        | 1.02 (0.98-1.07) | 0.37     | 0.87 (0.76-1.00)  | 0.05     | 1.10 (0.98-1.24)    | 0.12     | 0.99 (0.93-1.05)  | 0.73     | 0.86 (0.67-1.10)       | 0.23     |
| Osteoporosis                                                   | 1                        | 0.94 (0.90-0.99) | 0.01     | 0.94 (0.83-1.07)  | 0.34     | 0.89 (0.78-1.01)    | 0.08     | 0.99 (0.93-1.05)  | 0.73     | 1.26 (1.03-1.54)       | 0.02     |
| Rheumatoid arthritis                                           | 1                        | 0.96 (0.88-1.04) | 0.28     | 0.94 (0.75-1.17)  | 0.58     | 1.00 (0.81-1.25)    | 0.97     | 0.89 (0.80-0.99)  | 0.03     | 0.96 (0.63-1.44)       | 0.83     |
| <b>Brain</b>                                                   |                          |                  |          |                   |          |                     |          |                   |          |                        |          |
| Any brain outcome (dementia, delirium, or Parkinson's disease) | 1                        | 1.02 (0.97-1.09) | 0.43     | 0.93 (0.79-1.11)  | 0.43     | 1.03 (0.87-1.20)    | 0.76     | 1.00 (0.92-1.08)  | 0.91     | 1.23 (0.94-1.61)       | 0.13     |
| Dementia                                                       | 1                        | 1.00 (0.92-1.08) | 0.94     | 0.80 (0.63-1.02)  | 0.07     | 0.99 (0.80-1.24)    | 0.95     | 1.01 (0.91- 1.12) | 0.86     | 1.10 (0.76-1.60)       | 0.61     |
| Alzheimer's disease                                            | 1                        | 1.08 (0.97-1.20) | 0.18     | 0.86 (0.63-1.21)  | 0.40     | 1.20 (0.90-1.59)    | 0.21     | 1.02 (0.88-1.17)  | 0.84     | 1.02 (0.59-1.76)       | 0.95     |

|                          |   |                  |      |                  |      |                  |      |                  |      |                  |      |
|--------------------------|---|------------------|------|------------------|------|------------------|------|------------------|------|------------------|------|
| Non-Alzheimer's dementia | 1 | 0.93 (0.83-1.04) | 0.20 | 0.72 (0.50-1.03) | 0.07 | 0.81 (0.57-1.14) | 0.22 | 1.03 (0.89-1.18) | 0.73 | 1.17 (0.71-1.96) | 0.54 |
| Delirium                 | 1 | 1.07 (0.98-1.16) | 0.13 | 1.05 (0.84-1.31) | 0.67 | 1.06 (0.85-1.33) | 0.58 | 1.01 (0.91-1.13) | 0.79 | 1.44 (1.02-2.03) | 0.04 |
| Parkinson's disease      | 1 | 0.93 (0.80-1.07) | 0.29 | 0.97 (0.66-1.44) | 0.89 | 1.15 (0.79-1.65) | 0.47 | 0.98 (0.81-1.18) | 0.84 | 1.04 (0.52-2.10) | 0.91 |
| <b>Pancreas</b>          |   |                  |      |                  |      |                  |      |                  |      |                  |      |
| T1 or T2 diabetes        | 1 | 1.01 (0.97-1.06) | 0.54 | 0.98 (0.86-1.11) | 0.72 | 1.08 (0.96-1.22) | 0.20 | 1.02 (0.96-1.08) | 0.59 | 1.13 (0.90-1.41) | 0.28 |
| <b>Infection</b>         |   |                  |      |                  |      |                  |      |                  |      |                  |      |
| COVID-19                 | 1 | 1.02 (0.93-1.11) | 0.68 | 1.03 (0.81-1.30) | 0.83 | 1.02 (0.80-1.29) | 0.88 | 1.06 (0.94-1.18) | 0.34 | 1.00 (0.64-1.56) | 1.00 |
| Cholecystitis            | 1 | 0.98 (0.90-1.08) | 0.73 | 0.92 (0.71-1.19) | 0.52 | 0.98 (0.77-1.24) | 0.84 | 0.99 (0.88-1.11) | 0.86 | 1.49 (1.03-2.16) | 0.03 |
| Pneumonia                | 1 | 1.00 (0.96-1.05) | 0.84 | 1.02 (0.90-1.17) | 0.71 | 1.05 (0.93-1.20) | 0.41 | 1.03 (0.97-1.10) | 0.29 | 1.02 (0.81-1.29) | 0.85 |
| Sepsis                   | 1 | 0.98 (0.94-1.01) | 0.22 | 0.97 (0.88-1.08) | 0.62 | 1.05 (0.95-1.16) | 0.34 | 1.04 (0.99-1.09) | 0.11 | 1.14 (0.96-1.36) | 0.14 |
| LRTI                     | 1 | 0.95 (0.89-1.01) | 0.07 | 0.92 (0.78-1.09) | 0.34 | 0.93 (0.78-1.09) | 0.36 | 1.04 (0.97-1.12) | 0.29 | 1.14 (0.86-1.51) | 0.35 |
| URTI                     | 1 | 1.12 (0.97-1.29) | 0.13 | 0.86 (0.56-1.33) | 0.51 | 0.84 (0.54-1.30) | 0.43 | 1.12 (0.93-1.34) | 0.24 | 0.29 (0.07-1.17) | 0.08 |
| UTI                      | 1 | 0.97 (0.94-1.01) | 0.17 | 0.99 (0.89-1.10) | 0.82 | 1.02 (0.92-1.13) | 0.76 | 1.03 (0.98-1.08) | 0.22 | 1.17 (0.97-1.40) | 0.10 |
| SSTI                     | 1 | 1.01 (0.95-1.07) | 0.81 | 1.05 (0.90-1.23) | 0.54 | 1.00 (0.85-1.17) | 0.98 | 1.03 (0.95-1.11) | 0.52 | 1.20 (0.91-1.59) | 0.19 |
| <b>Cardiovascular</b>    |   |                  |      |                  |      |                  |      |                  |      |                  |      |
| Arrhythmia               | 1 | 1.02 (0.93-1.12) | 0.69 | 0.76 (0.57-1.01) | 0.06 | 1.04 (0.82-1.33) | 0.73 | 0.98 (0.87-1.11) | 0.78 | 1.13 (0.72-1.75) | 0.60 |
| Cardiomyopathy           | 1 | 0.97 (0.83-1.13) | 0.71 | 0.82 (0.52-1.30) | 0.41 | 1.07 (0.72-1.59) | 0.75 | 1.08 (0.90-1.31) | 0.40 | 0.46 (0.15-1.43) | 0.18 |
| CHD                      | 1 | 0.99 (0.95-1.04) | 0.81 | 1.03 (0.92-1.16) | 0.60 | 1.01 (0.89-1.13) | 0.92 | 1.01 (0.96-1.07) | 0.70 | 0.92 (0.74-1.15) | 0.48 |
| Heart failure            | 1 | 1.03 (0.97-1.10) | 0.28 | 0.92 (0.77-1.10) | 0.36 | 1.12 (0.95-1.32) | 0.17 | 1.06 (0.98-1.15) | 0.15 | 1.35 (1.03-1.77) | 0.03 |
| <b>Mental Health</b>     |   |                  |      |                  |      |                  |      |                  |      |                  |      |
| Depression               | 1 | 0.97 (0.93-1.02) | 0.20 | 1.10 (0.97-1.23) | 0.14 | 1.11 (0.98-1.25) | 0.09 | 1.03 (0.97-1.09) | 0.37 | 0.83 (0.64-1.08) | 0.16 |

HR (Hazard ratio) compared to those with neither *HFE* mutation. Cox proportional hazards regression models adjusted for age, assessment centre, and genetic principal components 1–10. Abbreviations: CHD, coronary heart disease; T1, type 1; T2, type 2; LRTI, lower respiratory tract infection; URTI, upper respiratory tract infection; UTI, urinary tract infection SSTI, skin and soft tissue infection; CI, confidence interval. Joint replacement surgery variable includes a diagnosis of hip, knee, ankle, or shoulder replacement. Any brain outcome variable includes a diagnosis of dementia, delirium, or Parkinson's disease

**eFigure 1.** Kaplan-Meier curves for the cumulative incidence of (a) mortality, (b) liver disease, (c) any joint replacement, and (d) any brain outcome, in male *HFE* p.C282Y homozygotes compared to those with no mutations, excluding a diagnosis of haemochromatosis at baseline

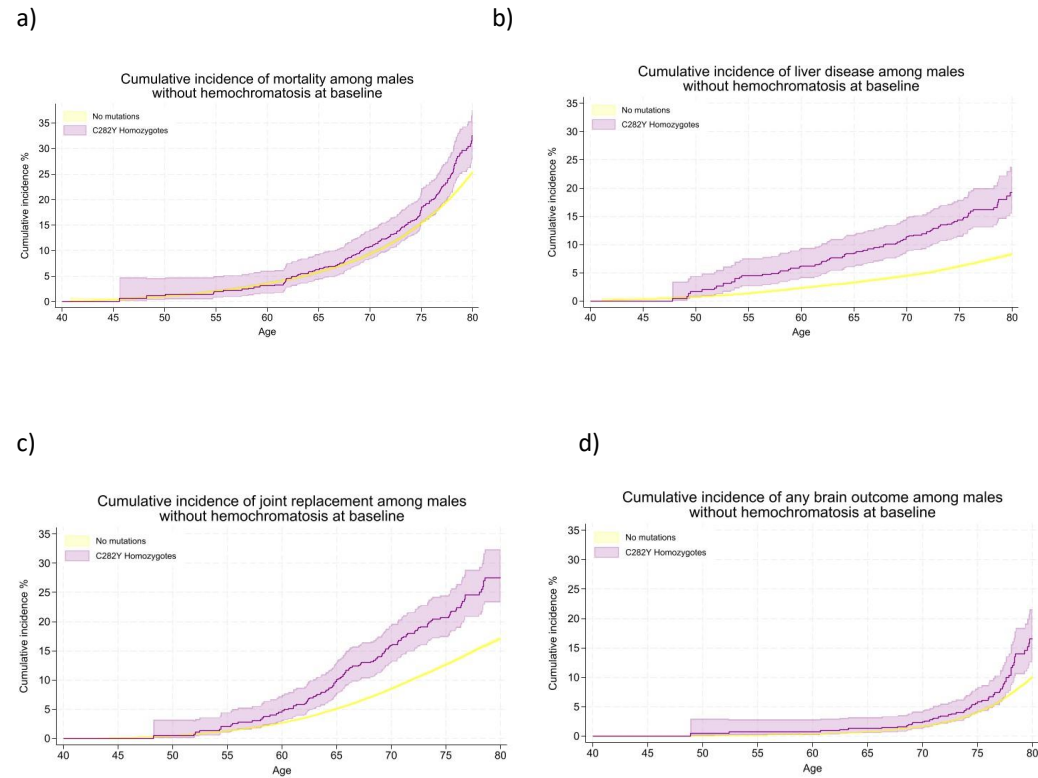

Cumulative incidence (estimated % diagnosed by age 80 years; 95% CIs). Joint replacement surgery includes a diagnosis of hip, knee, ankle, or shoulder replacement. Any brain outcome included a diagnosis of delirium, dementia, or Parkinson's disease.

**eFigure 2.** Kaplan-Meier curves for the cumulative incidence of (a) liver disease, and (b) any joint replacement, in female *HFE* p.C282Y homozygotes compared to those with no mutations, excluding a diagnosis of haemochromatosis at baseline

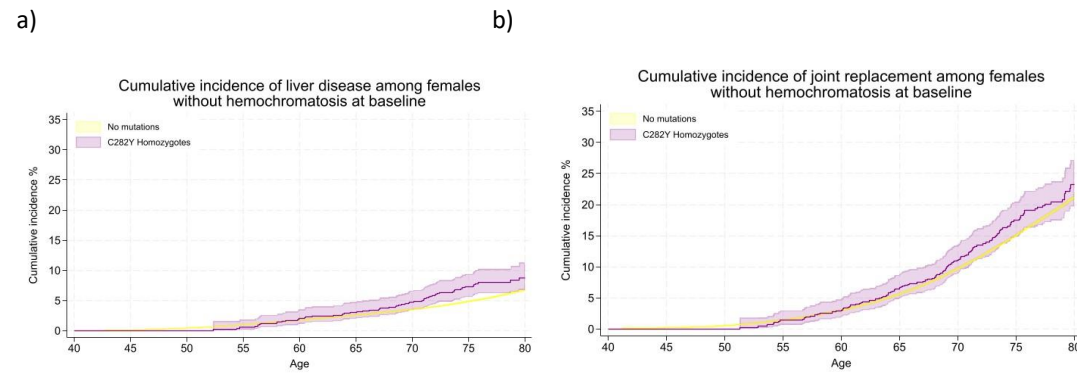

Cumulative incidence (estimated % diagnosed by age 80 years; 95% CIs). Joint replacement surgery includes a diagnosis of hip, knee, ankle, or shoulder replacement.
